# Supplementary material for: Family Affluence Based Inequality in Oral Health-Related Quality of Life in a Population of Lithuanian Adolescents
Source: MDPI journal article supplement (doi:10.3390/ijerph16122106), 2019-06-14
Supplement: s1 [file s1]

**THE STUDY ON  
CHILDREN'S ORAL HEALTH  
RELATED QUALITY OF LIFE**

**QUESTIONNAIRE FOR  
SCHOOLCHILDREN**

**EXTRACTION  
CHILD PERCEPTIONS QUESTIONNAIRE (CPQ)  
&  
FAMILY AFFLUENCE SCALE (FAS)  
ONLY**

*Dear Student,*

*Thanks for agreeing to participate in our study. By answering the questions you will help us to learn more about children's oral health problems and experiences. This will allow exploring deeper children's dental and other mouth organ diseases, to reveal their reasons, to pick the best treatment. It will be useful, because healthy teeth and mouth is full with good for your health and happiness.*

*How to fill out the questionnaire? Read each question carefully. Put cross "X" in the box, which is near or below the answer that is best for you. For each question, select only one answer, because otherwise we will not be able to count your answers. If it is difficult to choose a single answer, think about answer that at the moment is the most precise. In other cases, write your reply above the points in the selected location.*

*Very please reply to the questions on your own. Don't talk to anyone about the questions when you are answering them. Your answers are private. We promise that no one at the school and the parents (guardians) will know your answers. After filling out the questionnaire, put it in an envelope, seal and give it to the dentists visiting your school. Don't write your name neither on the questionnaire nor the envelope.*

*Thanks in advance for honesty and sincerity*

*The study is conducted by team of researchers from  
Lithuanian University of Health Sciences  
Clinic of Orthodontics and  
Clinic of Preventive and Children Odontology*

1. Today's date: \_\_\_\_\_ / \_\_\_\_\_ / 201\_\_\_\_\_  
DAY MONTH YEAR

**Initially, a few questions about you**

2. Date of your birth: \_\_\_\_\_ / \_\_\_\_\_ / \_\_\_\_\_  
DAY MONTH YEAR

3. Are you a boy or a girl?

*Cross ( X ) an appropriate box*

1 ☐ Boy

2 ☐ Girl

## Questions about your oral health

### 1. Over the last 3 months, have you felt any pain in the following mouth organs?

Select one box in each line

|                                  | 1<br><i>Never</i>        | 2<br><i>Once or twice</i> | 3<br><i>Sometimes</i>    | 4<br><i>Often</i>        | 5<br><i>Almost every day</i> |
|----------------------------------|--------------------------|---------------------------|--------------------------|--------------------------|------------------------------|
| a) Teeth                         | <input type="checkbox"/> | <input type="checkbox"/>  | <input type="checkbox"/> | <input type="checkbox"/> | <input type="checkbox"/>     |
| b) Lips                          | <input type="checkbox"/> | <input type="checkbox"/>  | <input type="checkbox"/> | <input type="checkbox"/> | <input type="checkbox"/>     |
| c) Gums                          | <input type="checkbox"/> | <input type="checkbox"/>  | <input type="checkbox"/> | <input type="checkbox"/> | <input type="checkbox"/>     |
| d) The lining of the mouth organ | <input type="checkbox"/> | <input type="checkbox"/>  | <input type="checkbox"/> | <input type="checkbox"/> | <input type="checkbox"/>     |
| e) Jaws and joints               | <input type="checkbox"/> | <input type="checkbox"/>  | <input type="checkbox"/> | <input type="checkbox"/> | <input type="checkbox"/>     |

### 2. Over the past 3 months, how often have you had the following?

Select one box in each line

|                                        | 1<br><i>Never</i>        | 2<br><i>Once or twice</i> | 3<br><i>Sometimes</i>    | 4<br><i>Often</i>        | 5<br><i>Almost every day</i> |
|----------------------------------------|--------------------------|---------------------------|--------------------------|--------------------------|------------------------------|
| a) Bleeding gums while brushing teeth  | <input type="checkbox"/> | <input type="checkbox"/>  | <input type="checkbox"/> | <input type="checkbox"/> | <input type="checkbox"/>     |
| b) Had sores and wounds in your mouth  | <input type="checkbox"/> | <input type="checkbox"/>  | <input type="checkbox"/> | <input type="checkbox"/> | <input type="checkbox"/>     |
| c) Bad breath                          | <input type="checkbox"/> | <input type="checkbox"/>  | <input type="checkbox"/> | <input type="checkbox"/> | <input type="checkbox"/>     |
| d) Food stuck in or between the teeth  | <input type="checkbox"/> | <input type="checkbox"/>  | <input type="checkbox"/> | <input type="checkbox"/> | <input type="checkbox"/>     |
| e) Food stuck in the top of your mouth | <input type="checkbox"/> | <input type="checkbox"/>  | <input type="checkbox"/> | <input type="checkbox"/> | <input type="checkbox"/>     |

## Questions about limitations related to your oral health

### 3. In the past 3 months, how often has this happened because of your teeth and oral health?

Select one box in each line

|                                                                  | 1<br><i>Never</i>        | 2<br><i>Once or twice</i> | 3<br><i>Sometimes</i>    | 4<br><i>Often</i>        | 5<br><i>Almost every day</i> |
|------------------------------------------------------------------|--------------------------|---------------------------|--------------------------|--------------------------|------------------------------|
| a) Difficult to bite or chew hard solid food like apples or meat | <input type="checkbox"/> | <input type="checkbox"/>  | <input type="checkbox"/> | <input type="checkbox"/> | <input type="checkbox"/>     |
| b) Difficult to open your mouth wide                             | <input type="checkbox"/> | <input type="checkbox"/>  | <input type="checkbox"/> | <input type="checkbox"/> | <input type="checkbox"/>     |
| c) Difficult to say any words                                    | <input type="checkbox"/> | <input type="checkbox"/>  | <input type="checkbox"/> | <input type="checkbox"/> | <input type="checkbox"/>     |
| d) Difficult to eat foods you would like to eat                  | <input type="checkbox"/> | <input type="checkbox"/>  | <input type="checkbox"/> | <input type="checkbox"/> | <input type="checkbox"/>     |
| e) Difficult to drink with a straw                               | <input type="checkbox"/> | <input type="checkbox"/>  | <input type="checkbox"/> | <input type="checkbox"/> | <input type="checkbox"/>     |
| f) Difficult to drink or eat hot or cold foods                   | <input type="checkbox"/> | <input type="checkbox"/>  | <input type="checkbox"/> | <input type="checkbox"/> | <input type="checkbox"/>     |

### 4. In the past 3 months, how often has this happened because of your teeth and oral conditions?

Select one box in each line. If this was not associated with dental or oral health, note the answer 'Never'.

|                                         | 1<br><i>Never</i>        | 2<br><i>Once or twice</i> | 3<br><i>Sometimes</i>    | 4<br><i>Often</i>        | 5<br><i>Almost every day</i> |
|-----------------------------------------|--------------------------|---------------------------|--------------------------|--------------------------|------------------------------|
| a) Breathed through your mouth          | <input type="checkbox"/> | <input type="checkbox"/>  | <input type="checkbox"/> | <input type="checkbox"/> | <input type="checkbox"/>     |
| b) Taken longer than others to eat meal | <input type="checkbox"/> | <input type="checkbox"/>  | <input type="checkbox"/> | <input type="checkbox"/> | <input type="checkbox"/>     |
| c) Had trouble sleeping                 | <input type="checkbox"/> | <input type="checkbox"/>  | <input type="checkbox"/> | <input type="checkbox"/> | <input type="checkbox"/>     |

## Questions about your feelings and emotions caused by oral health

5. In the past 3 months, how often have you had these feelings and emotions because of your teeth and oral health?

Select one box in each line. If this was not associated with dental or oral health, note the answer 'Never'.

|                                                                                | 1                        | 2                        | 3                        | 4                        | 5                        |
|--------------------------------------------------------------------------------|--------------------------|--------------------------|--------------------------|--------------------------|--------------------------|
|                                                                                | Never                    | Once or twice            | Sometimes                | Often                    | Almost every day         |
| a) You felt irritable or frustrated                                            | <input type="checkbox"/> |
| b) You felt unsure of yourself                                                 | <input type="checkbox"/> |
| c) You felt shy or embarrassed                                                 | <input type="checkbox"/> |
| d) You concerned that other people have bad thoughts about your teeth or mouth | <input type="checkbox"/> |
| e) You worried that your teeth or mouth are not as good-looking as others      | <input type="checkbox"/> |
| f) You have been upset because of your teeth or mouth                          | <input type="checkbox"/> |
| g) You felt nervous or afraid because of your teeth or mouth                   | <input type="checkbox"/> |
| h) You worried that your teeth or mouth are not as healthy as others           | <input type="checkbox"/> |
| i) You worried that your teeth or mouth appear different than other people     | <input type="checkbox"/> |

## Questions about school, friends and leisure time

6. In the past 3 months, how often have you had these experiences because of your teeth and oral health?  
*Select one box in each line. If this was not associated with dental or oral condition, note the answer 'Never'.*

|                                                                                 | 1                        | 2                        | 3                        | 4                        | 5                        |
|---------------------------------------------------------------------------------|--------------------------|--------------------------|--------------------------|--------------------------|--------------------------|
|                                                                                 | Never                    | Once or twice            | Sometimes                | Often                    | Almost every day         |
| a) Avoided to go to school because of your teeth or mouth                       | <input type="checkbox"/> |
| b) Could not concentrate at school                                              | <input type="checkbox"/> |
| c) Could not concentrate on homework                                            | <input type="checkbox"/> |
| d) Avoided to speak or read aloud in classroom                                  | <input type="checkbox"/> |
| e) Avoided taking part in common activities (sports, choir, get together, etc.) | <input type="checkbox"/> |
| f) You not wanted to talk to other people                                       | <input type="checkbox"/> |
| g) Avoided smiling or laughing when around other people                         | <input type="checkbox"/> |
| h) Generally speaking, you avoided being with friends                           | <input type="checkbox"/> |
| i) You argued with other children or your family                                | <input type="checkbox"/> |
| j) It was difficult to play the wind musical instrument (if you play)           | <input type="checkbox"/> |

**7. In the past 3 months, how often have other children had the following because of your teeth and oral health?**

*Select one box in each line. If this was not associated with dental or oral condition, note the answer 'Never'.*

|                                                                  | 1                        | 2                        | 3                        | 4                        | 5                        |
|------------------------------------------------------------------|--------------------------|--------------------------|--------------------------|--------------------------|--------------------------|
|                                                                  | <i>Never</i>             | <i>Once or twice</i>     | <i>Sometimes</i>         | <i>Often</i>             | <i>Almost every day</i>  |
| a) Other children teased you or called names                     | <input type="checkbox"/> |
| b) Other children made you feel left out                         | <input type="checkbox"/> |
| c) Other children asked you questions about your teeth and mouth | <input type="checkbox"/> |



## Questions about your parents and family

**1. How many computers does your family own?**

- 1 ☐ None
- 2 ☐ One
- 3 ☐ Two
- 4 ☐ Three or more

**2. Does your family own a car, van or truck?**

- 1 ☐ No
- 2 ☐ Yes, one
- 3 ☐ Yes, two or more

**3. During the past 12 months, how many times did you travel away on holiday (vacation) with your family?**

- 1 ☐ Not at all
- 2 ☐ Once
- 3 ☐ Twice
- 4 ☐ More than twice

**4. Do you have your own bedroom for yourself?**

- 1 ☐ No
- 2 ☐ Yes

**Thank you for your honest answers.  
Please check if you have answered to all questions.**
