# Supplementary material for: Family Affluence Based Inequality in Oral Health-Related Quality of Life in a Population of Lithuanian Adolescents
Source: MDPI journal article supplement (doi:10.3390/ijerph16122106), 2019-06-14
Supplement: s1 [file s1]

**THE STUDY ON  
CHILDREN'S ORAL HEALTH  
RELATED QUALITY OF LIFE**

**RECORD FORM FOR  
ORAL HEALTH EXAMINATION**

**EXTRACTION  
INDEX OF COMPLEXITY, OUTCOME AND NEED (ICON)  
ONLY**

## Aesthetic component (AC) of the ICON

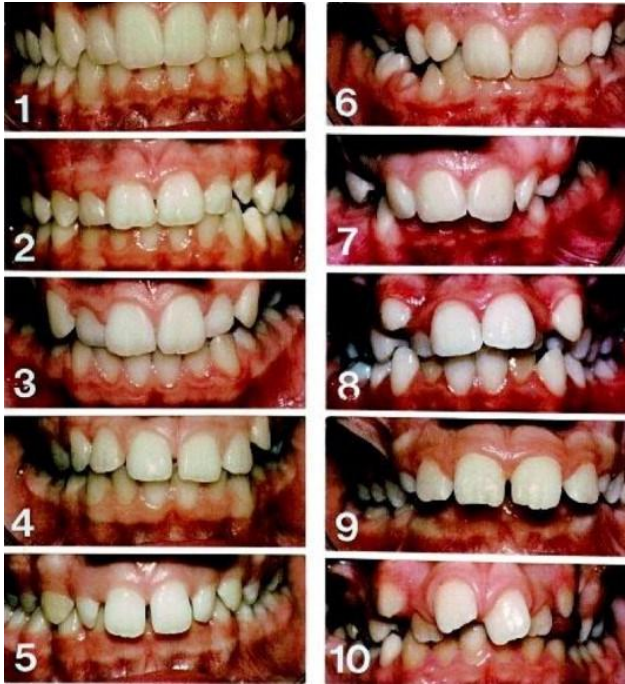

**Figure 1.** Aesthetic Assessment 10 photographs showing different level of dental attractiveness on a scale 1–10 [27]

**AC     Aesthetic assessment (1.....10)**

.....

## Dental component of the ICON

### ICON1 A. Upper arch crowding

- 0 ☐  $\leq 2$  mm  
 1 ☐ 2.1 to 5 mm  
 2 ☐ 5.1 to 9 mm  
 3 ☐ 9.1 to 13 mm  
 4 ☐ 13.1 to 17 mm  
 5 ☐  $\geq 17.1$  mm

### B. Upper arch spacing

- 0 ☐  $\leq 2$  mm  
 1 ☐ 2.1 to 5 mm  
 2 ☐ 5.1 to 9 mm  
 3 ☐ 9.1 to 13 mm  
 4 ☐  $\geq 13.1$  mm  
 5 ☐ Impacted teeth

### ICON2. Crossbite

- 0 ☐ No  
 1 ☐ Yes

### ICON3 A. Incisor open bite

- 0 ☐ Edge to edge  
 1 ☐  $< 1$  mm  
 2 ☐ 1.1 to 2 mm  
 3 ☐ 2.1 to 4 mm  
 4 ☐  $\geq 4.1$  mm

### B. Incisor overbite

- 0 ☐  $< 1/3$  lower incisor coverage  
 1 ☐  $1/3$  to  $2/3$  coverage  
 2 ☐  $2/3$  up to full covered  
 3 ☐ Full lower incisor coverage

### ICON4 The fit of the upper and lower posterior teeth in an antero-posterior perspective:

#### Right side

#### Left side

|                            |                                                                |                            |
|----------------------------|----------------------------------------------------------------|----------------------------|
| 0 <input type="checkbox"/> | Cusp to cusp embrasure only (Class I, II, III)                 | 0 <input type="checkbox"/> |
| 1 <input type="checkbox"/> | Any cusp relationship up to,<br>but not including cusp to cusp | 1 <input type="checkbox"/> |
| 2 <input type="checkbox"/> | Cusp to cusp                                                   | 2 <input type="checkbox"/> |

*Table 1. ICON Scoring Matrix and Calculation of Scores*

[illegible]
